# Supplementary material
Source: PubMed Central journal article supplement (PMC3747776)

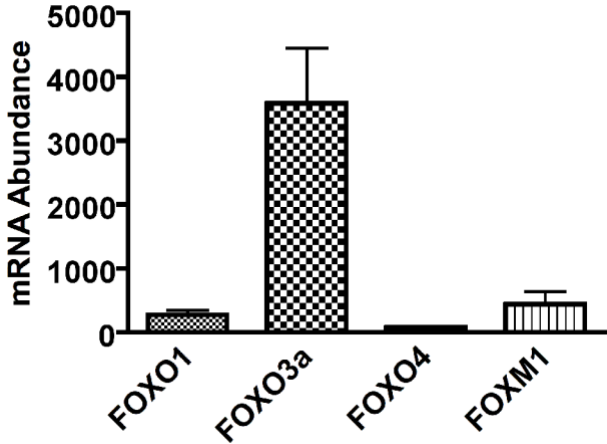

**A**TNF- $\alpha$ /IL-1 $\beta$ 

0' 5' 10' 15' 30' 1h 2h 6h

p-FOXO3a

← 98KD

FOXO3a

← 98KD

 $\beta$ -actin

← 46KD

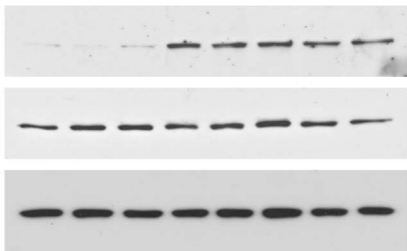**B**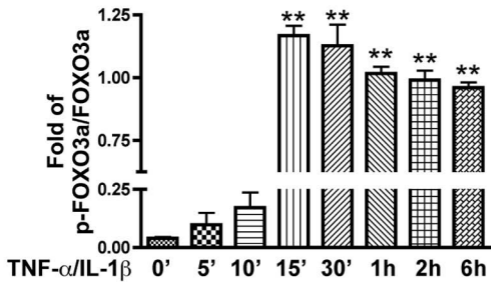

**A****Ad-GFP****Ad-WT-O3a****Ad-DN-O3a**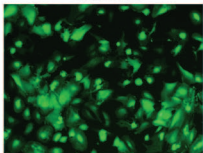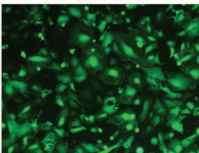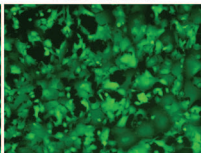**B**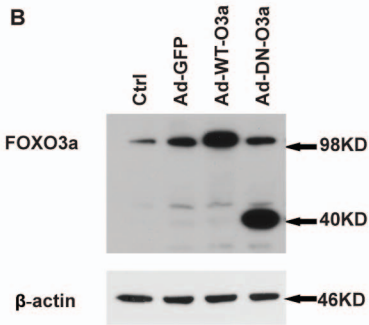

Supplement: NIHMS439908-supplement-Supp_Fig_S1-S3.pdf [file NIHMS439908-supplement-Supp_Fig_S1-S3.pdf]
